# Supplementary material for: Genome-Wide Identification and Expression Profile under Abiotic Stress of the barley Non-Specific Lipid Transfer Protein Gene Family and its Qingke Orthologs
Source: Research Square preprint supplement (doi:10.21203/rs.3.rs-478600/v1), 2021-05-06
Supplement: Supplementary file 3 [file d280ed8a78f087be4c494828.xlsx]

## Sheet: table2
Table 2 Numbers of nsLTP genes in different species
species	Total number of members	Type 1	Type 2	Type C	Type D	Type E	Type G	Type X
Hordeum vulgare	40	16	5	0	11	0	8	0
Qingke	35	13	5	0	10	0	7	0
Arabidopsis thaliana	79	13	13	3	12	2	33	3
Oryza sativa	77	18	13	2	14	0	27	3
Zea mays	63	8	9	2	15	0	26	3
Brassica oleracea var. capitata	89	19	12	1	18	2	28	9
